# Supplementary material
Source: PubMed Central journal article supplement (PMC3116286)
Supplement: emboj2011156s4.pdf [file emboj2011156s4.pdf]

A

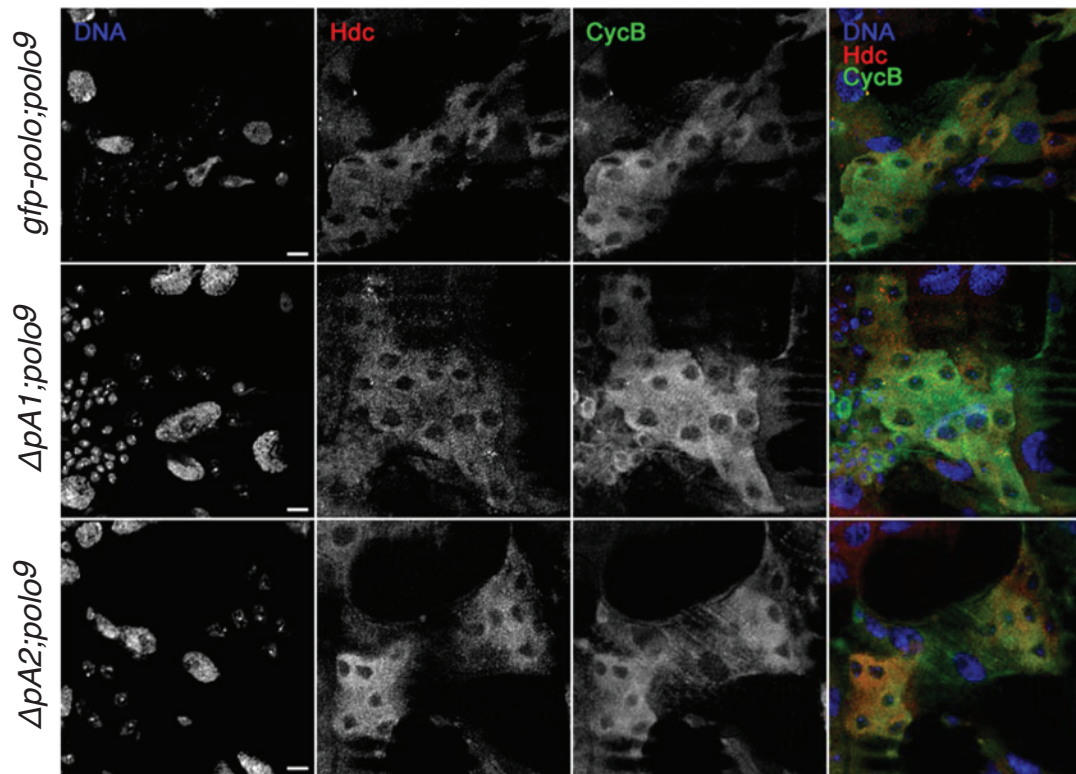

B

| Nest | Strain                                           | Abdominal segments |    |    |    |    |    |
|------|--------------------------------------------------|--------------------|----|----|----|----|----|
|      |                                                  | A2                 | A3 | A4 | A5 | A6 | A7 |
| ADH  | <i>gfp-polo; polo<sup>9</sup></i>                | 10                 | 15 | 15 | 12 | 12 | 10 |
|      | <i>gfp-polo</i> $\Delta pA1; polo^9$ (Line 12.1) | 13                 | 12 | 16 | 12 | 16 | 14 |
|      | <i>gfp-polo</i> $\Delta pA2; polo^9$ (Line 2.3)  | 16                 | 16 | 15 | 12 | 12 | 12 |
| PDH  | <i>gfp-polo; polo<sup>9</sup></i>                | 5                  | 6  | 5  | 3  | 3  | 3  |
|      | <i>gfp-polo</i> $\Delta pA1; polo^9$ (Line 12.1) | 4                  | 4  | 4  | 3  | 3  | 2  |
|      | <i>gfp-polo</i> $\Delta pA2; polo^9$ (Line 2.3)  | 4                  | 4  | 4  | 4  | 3  | 2  |
| VH   | <i>gfp-polo; polo<sup>9</sup></i>                | 15                 | 13 | 13 | 10 | 11 | 11 |
|      | <i>gfp-polo</i> $\Delta pA1; polo^9$ (Line 12.1) | 14                 | 11 | 7  | 10 | 8  | 10 |
|      | <i>gfp-polo</i> $\Delta pA2; polo^9$ (Line 2.3)  | 13                 | 13 | 13 | 11 | 11 | 6  |
