# Supplementary material
Source: PubMed Central journal article supplement (PMC3116286)

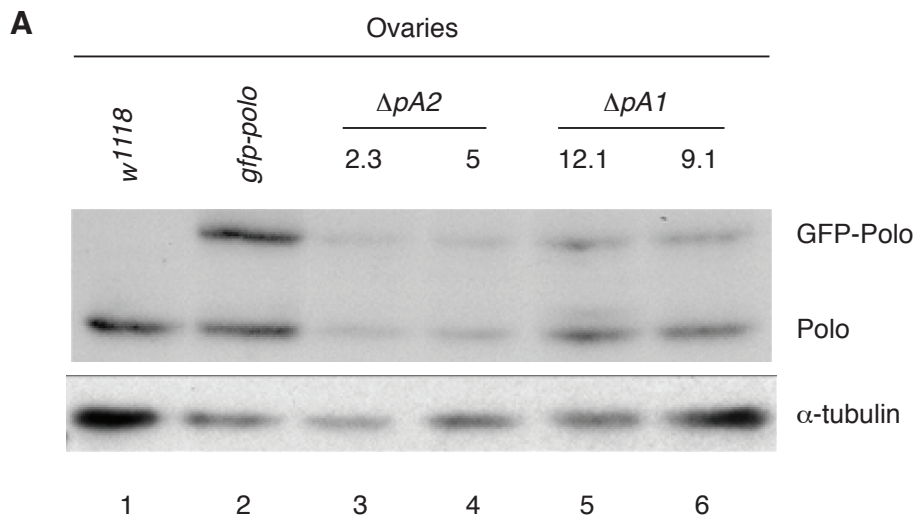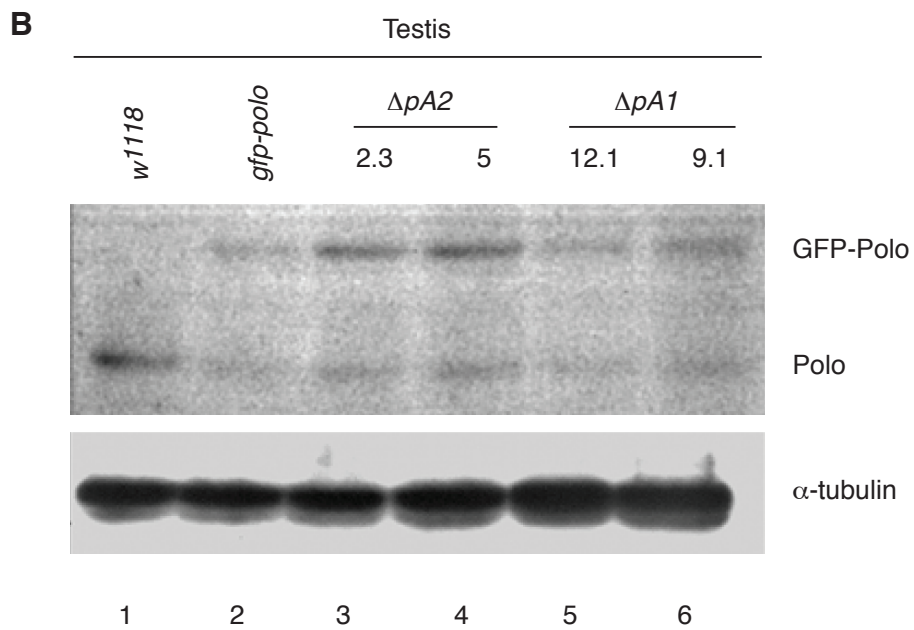

Supplement: emboj2011156s1.pdf [file emboj2011156s1.pdf]

$\Delta pA2$

line 5

line 2.3

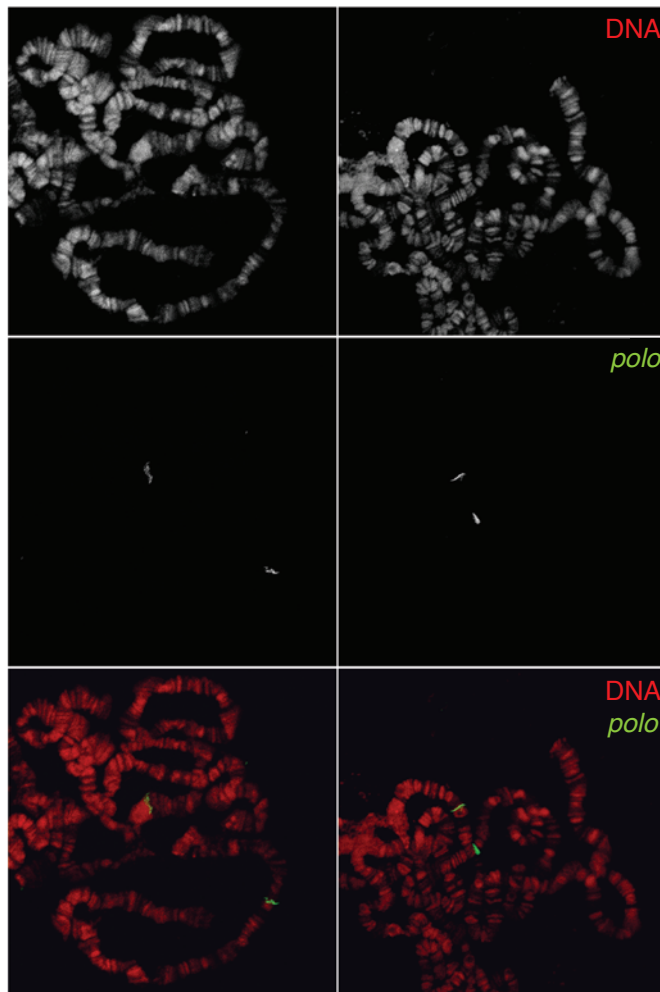

Supplement: emboj2011156s2.pdf [file emboj2011156s2.pdf]

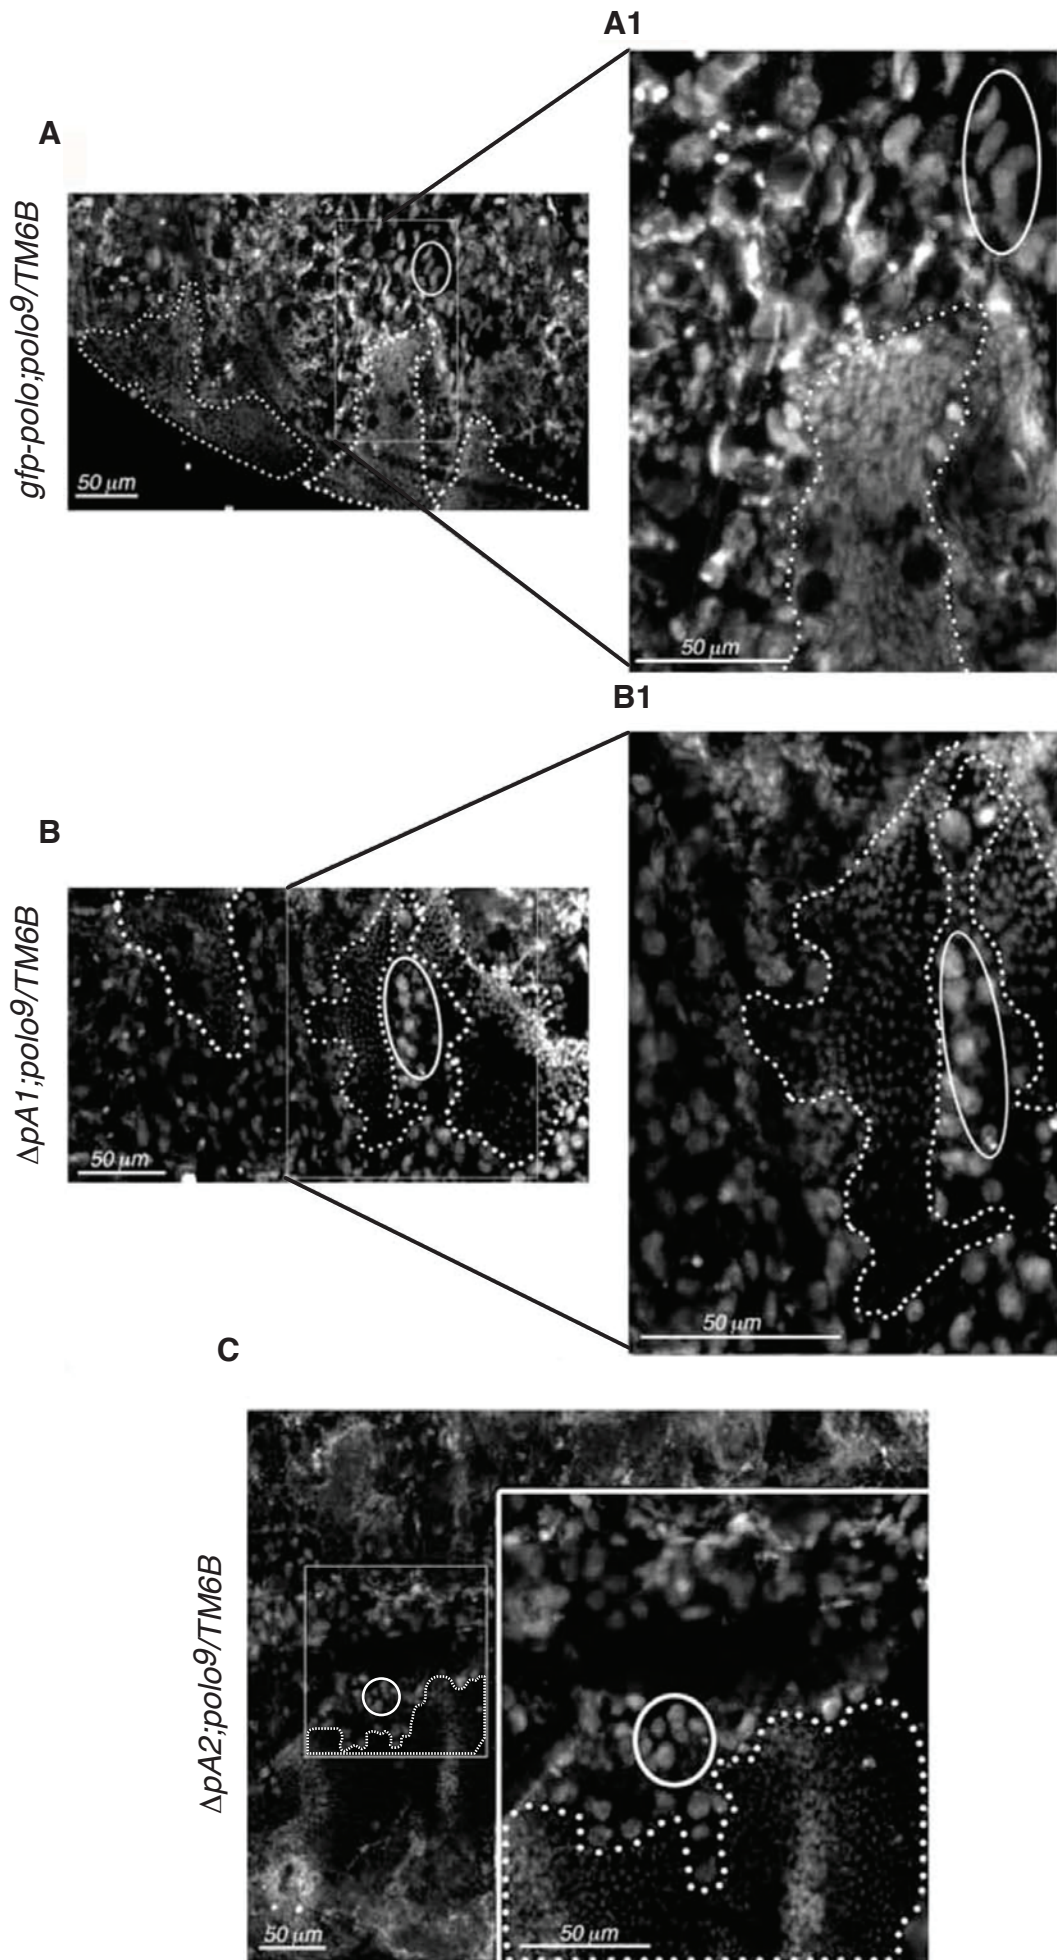

Supplement: emboj2011156s3.pdf [file emboj2011156s3.pdf]

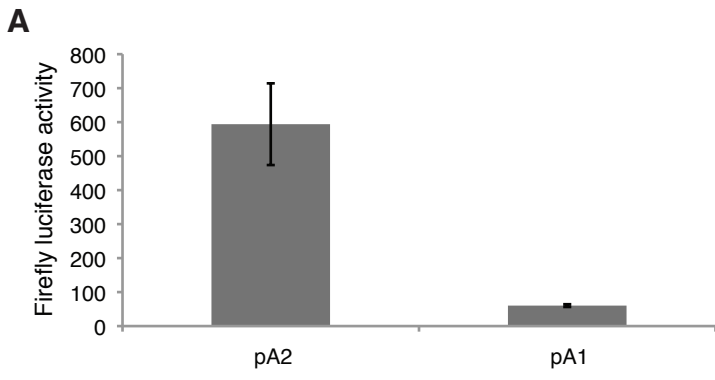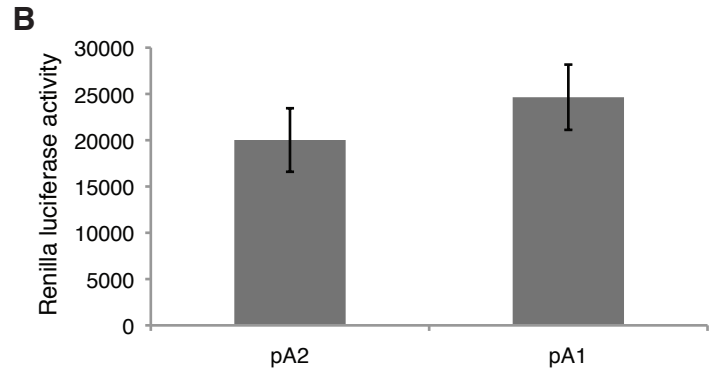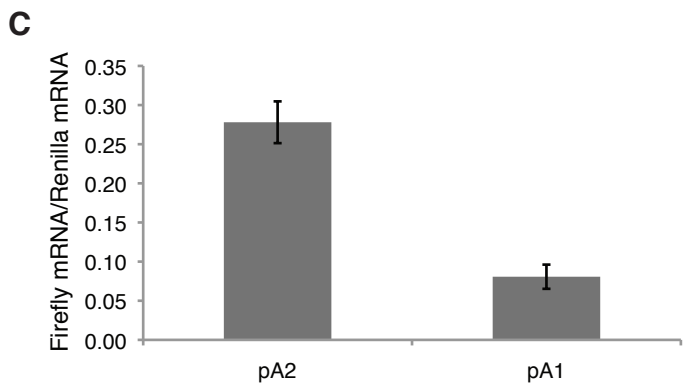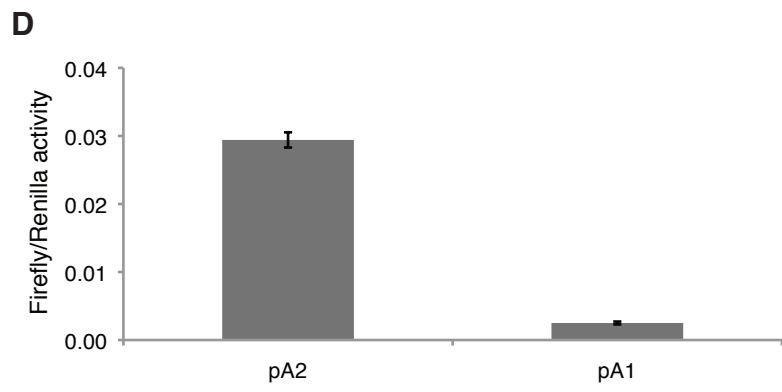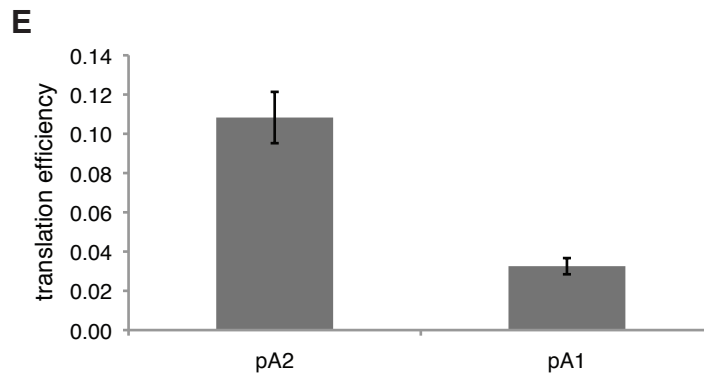

Supplement: emboj2011156s5.pdf [file emboj2011156s5.pdf]

**A**

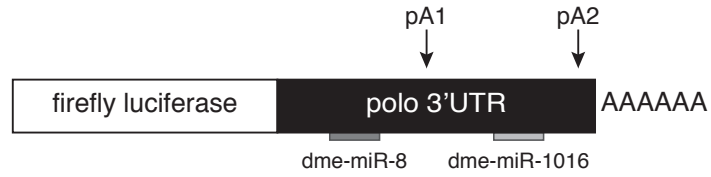

**B**

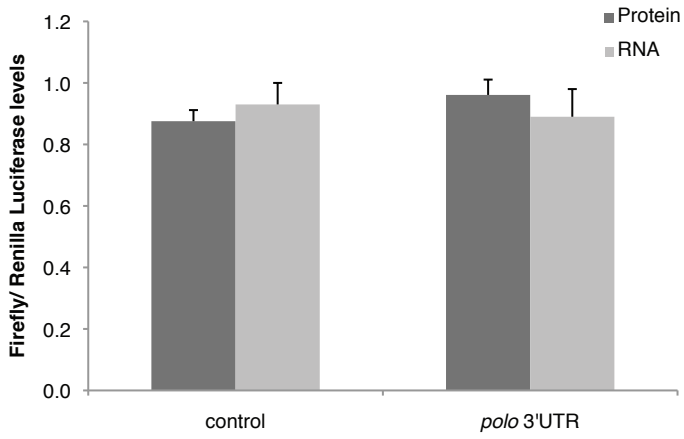

**C**

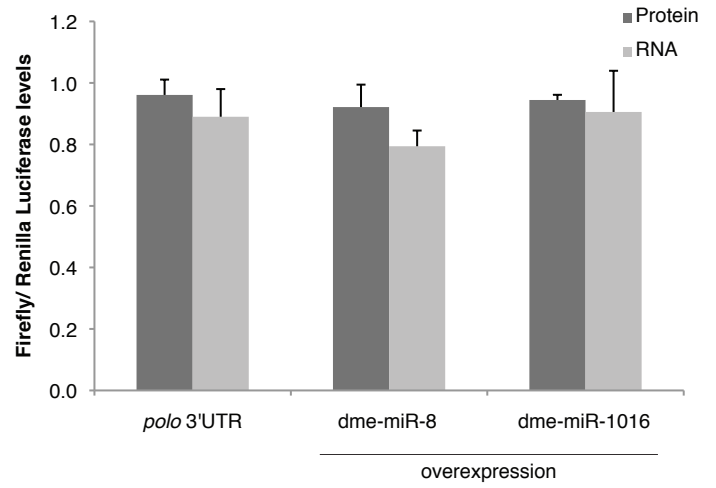

**D**

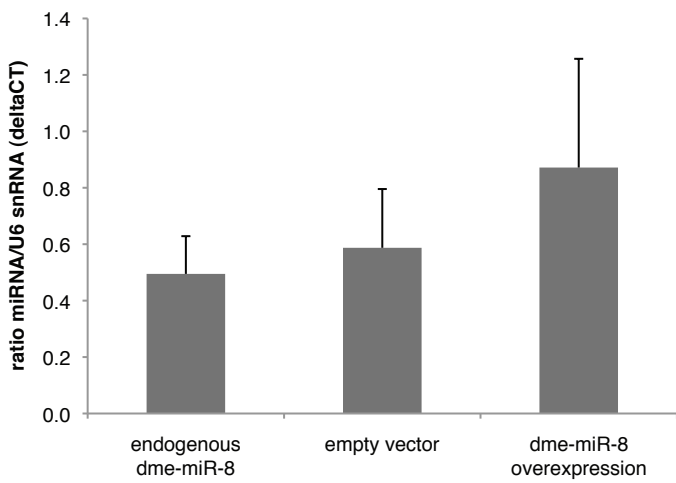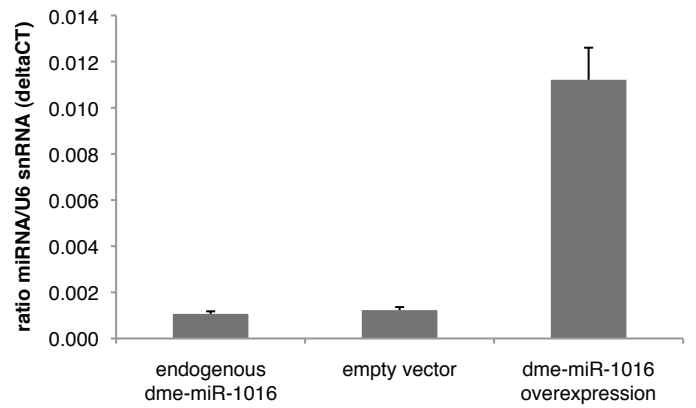

Supplement: emboj2011156s6.pdf [file emboj2011156s6.pdf]
